# Supplementary material for: The location of splenic NKT cells favours their rapid activation by blood-borne antigen
Source: PubMed Central journal article supplement — EMBO J. 2012 Apr 13;31(10):2378–90. doi: 10.1038/emboj.2012.87 (PMC3364740; doi:10.1038/emboj.2012.87), 2012-04-13
Supplement: emboj201287s6.pdf [file emboj201287s6.pdf]

# Supplementary Figure 1

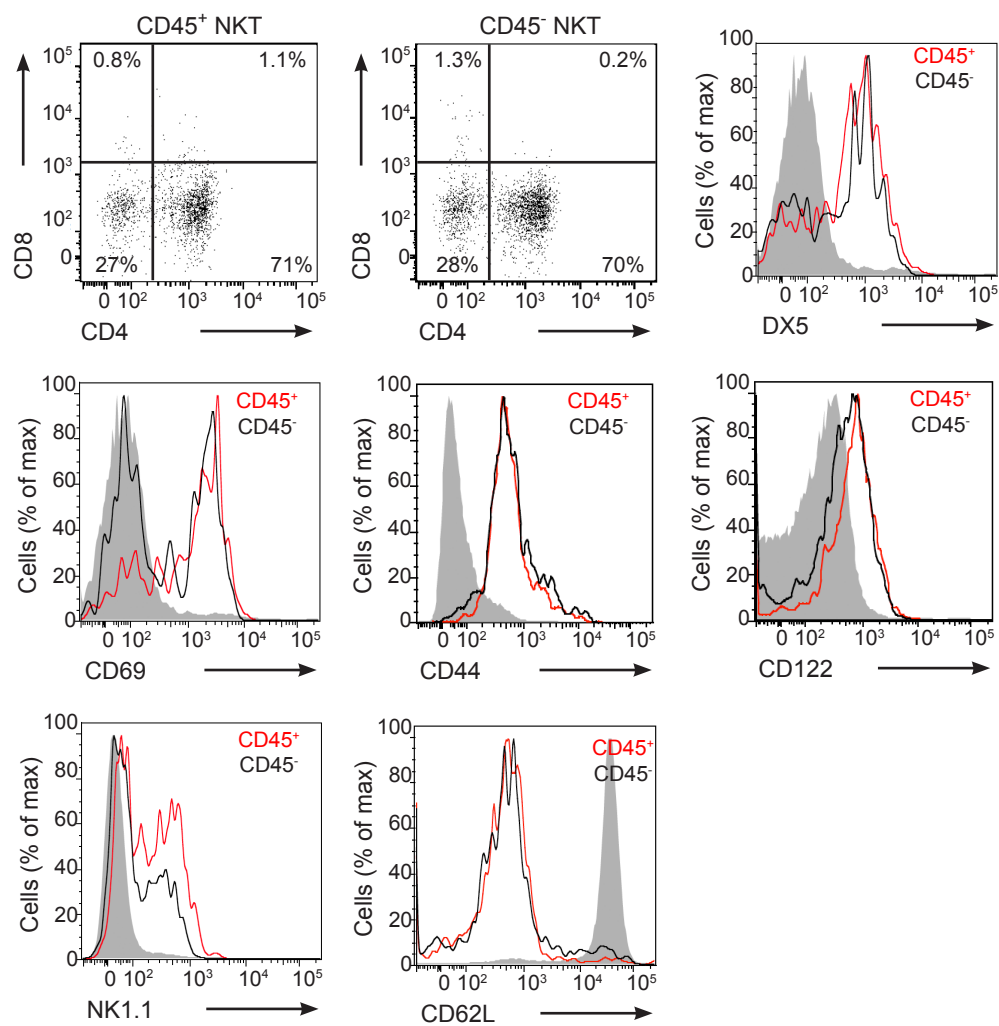

## Supplementary Figure 2

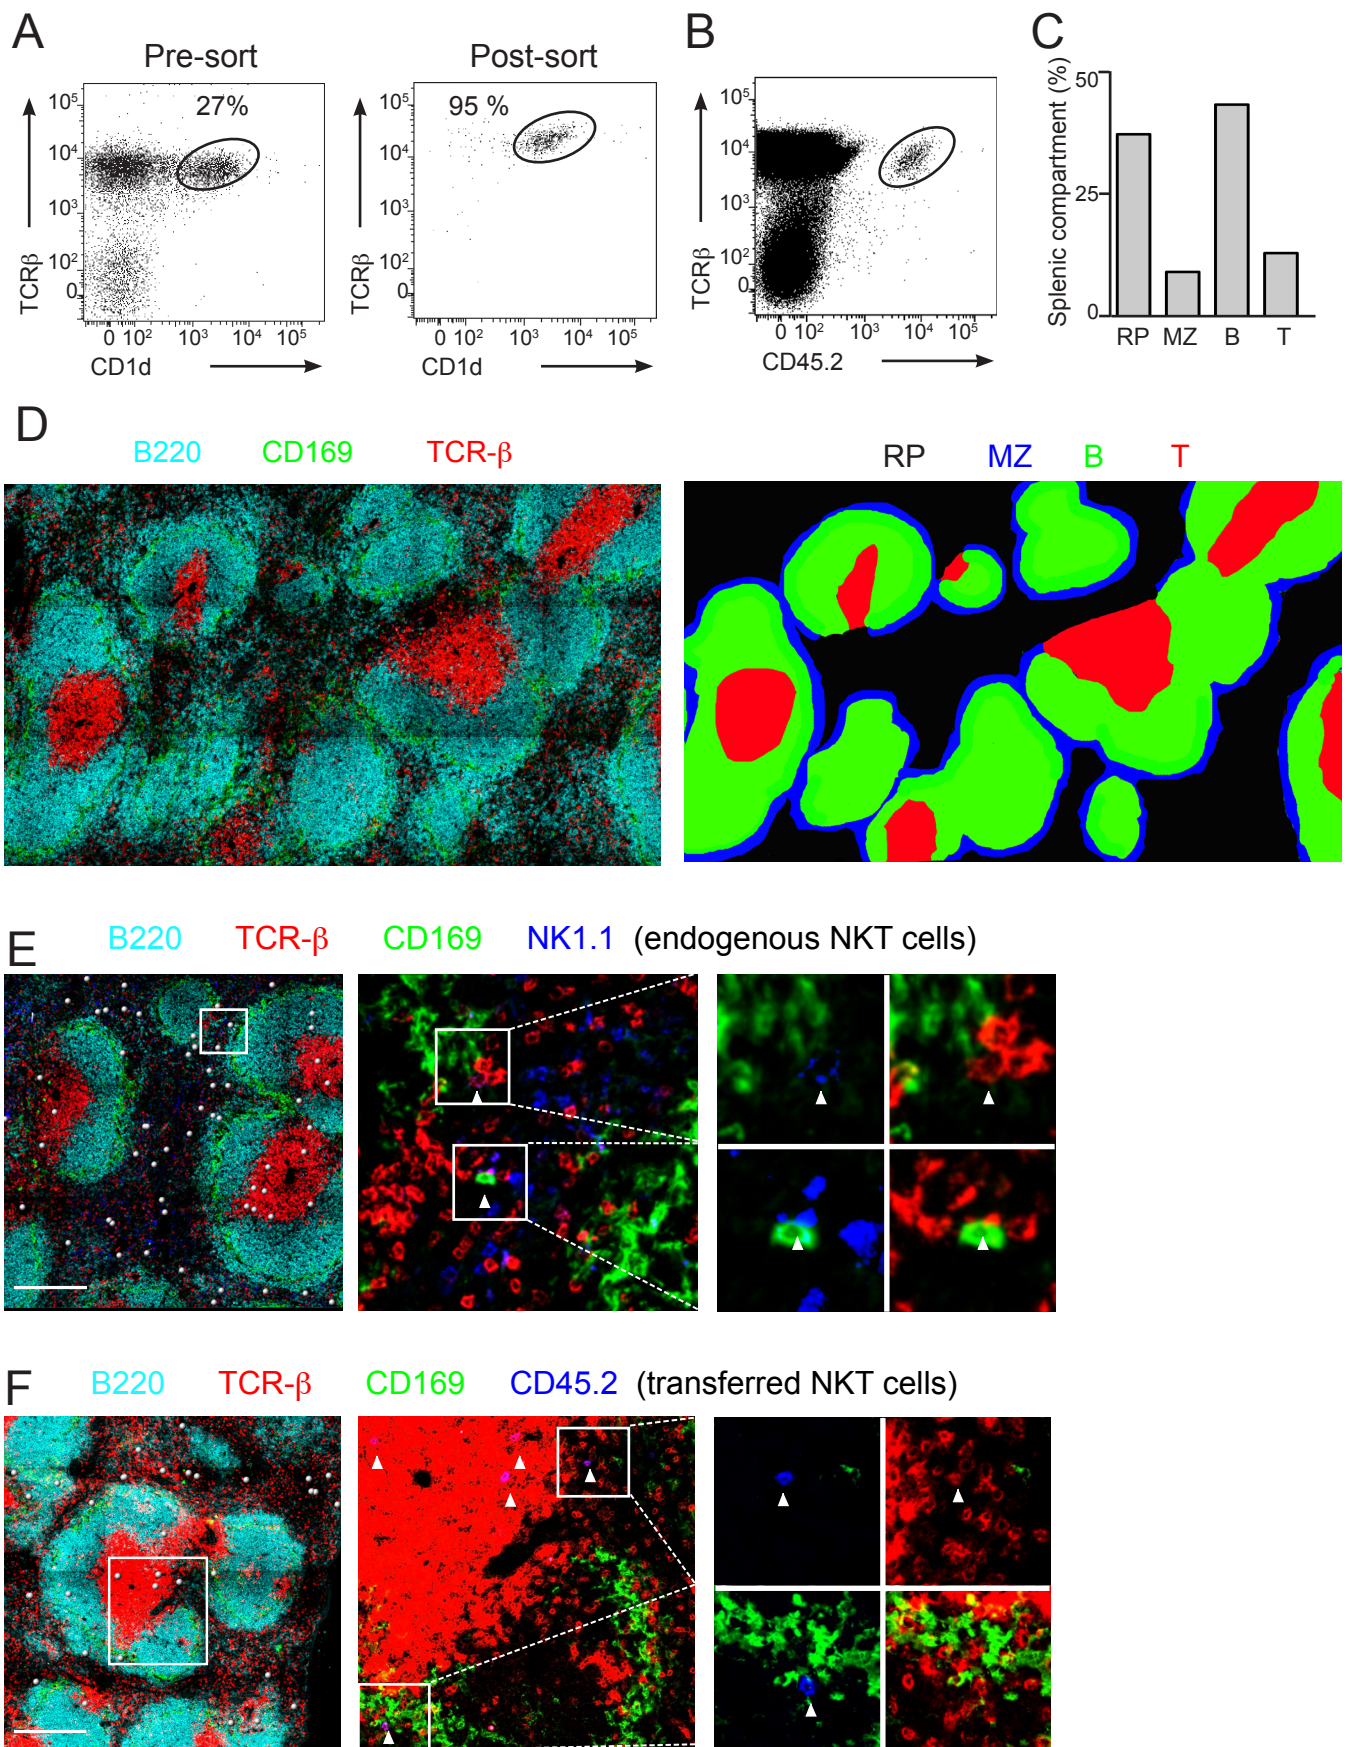

# Supplementary Figure 3

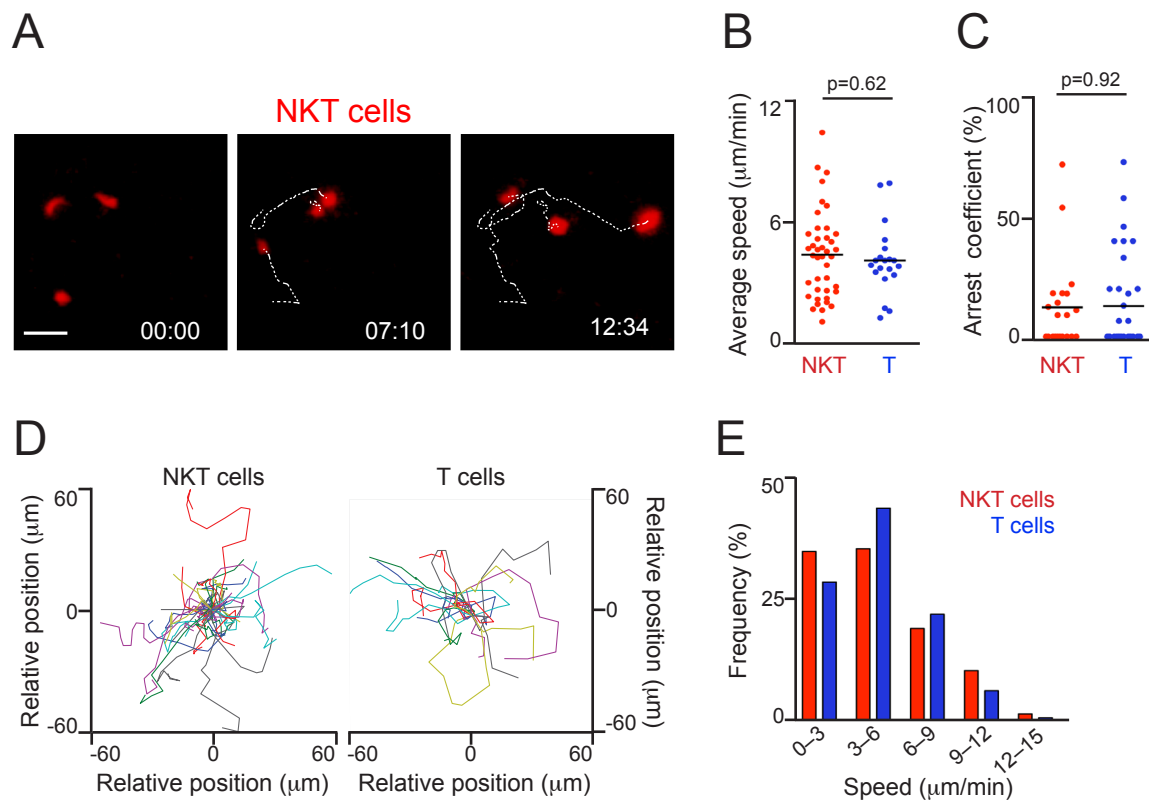

# Supplementary Figure 4

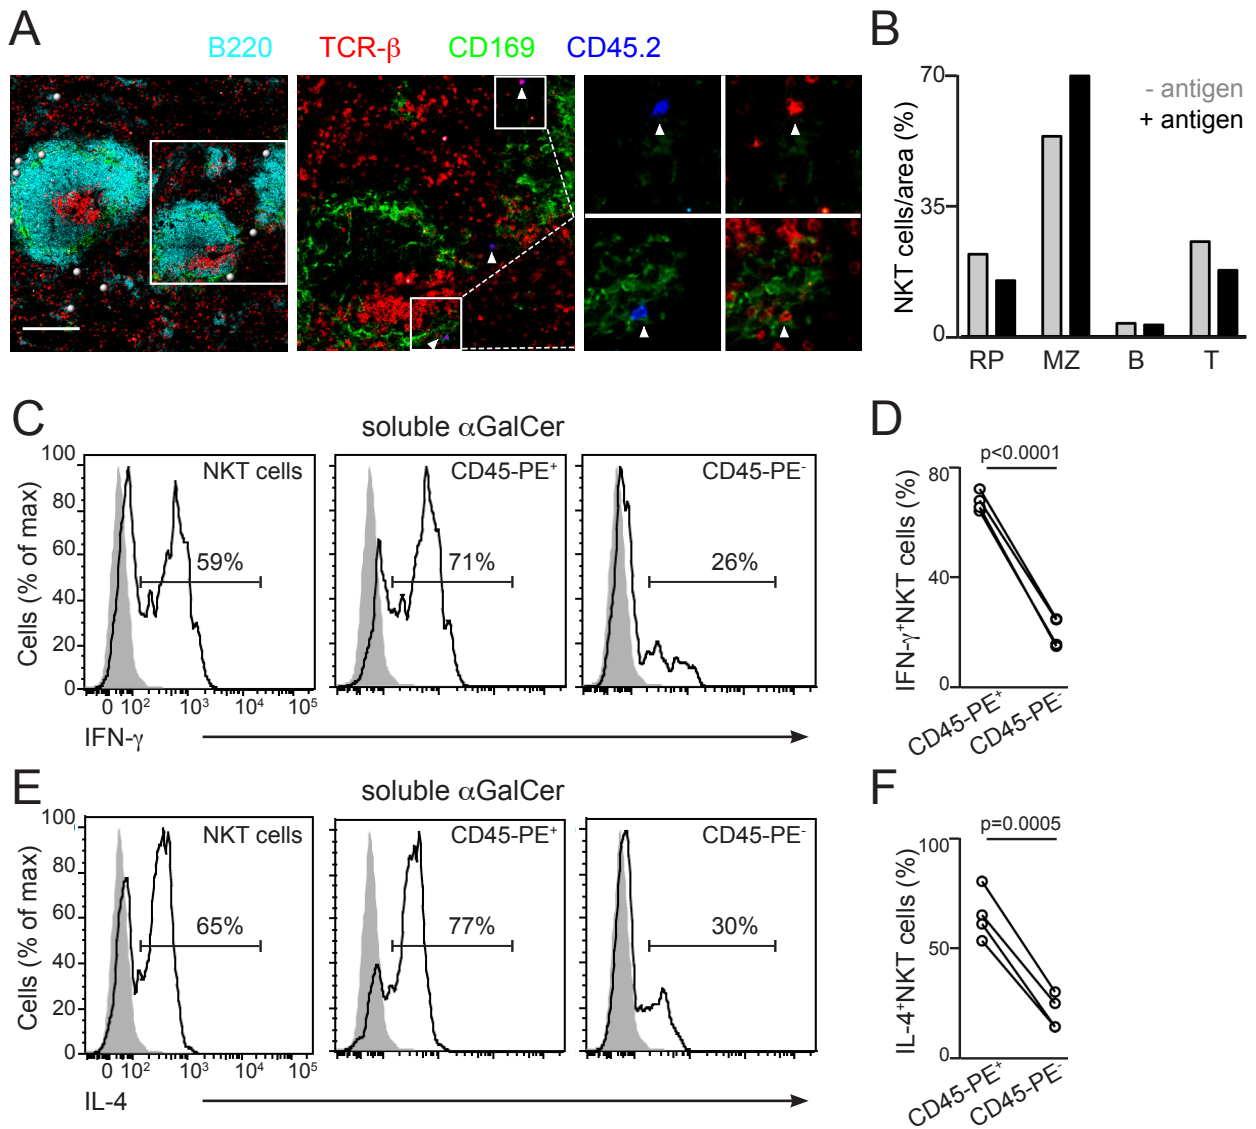



# Supplementary Figure 5

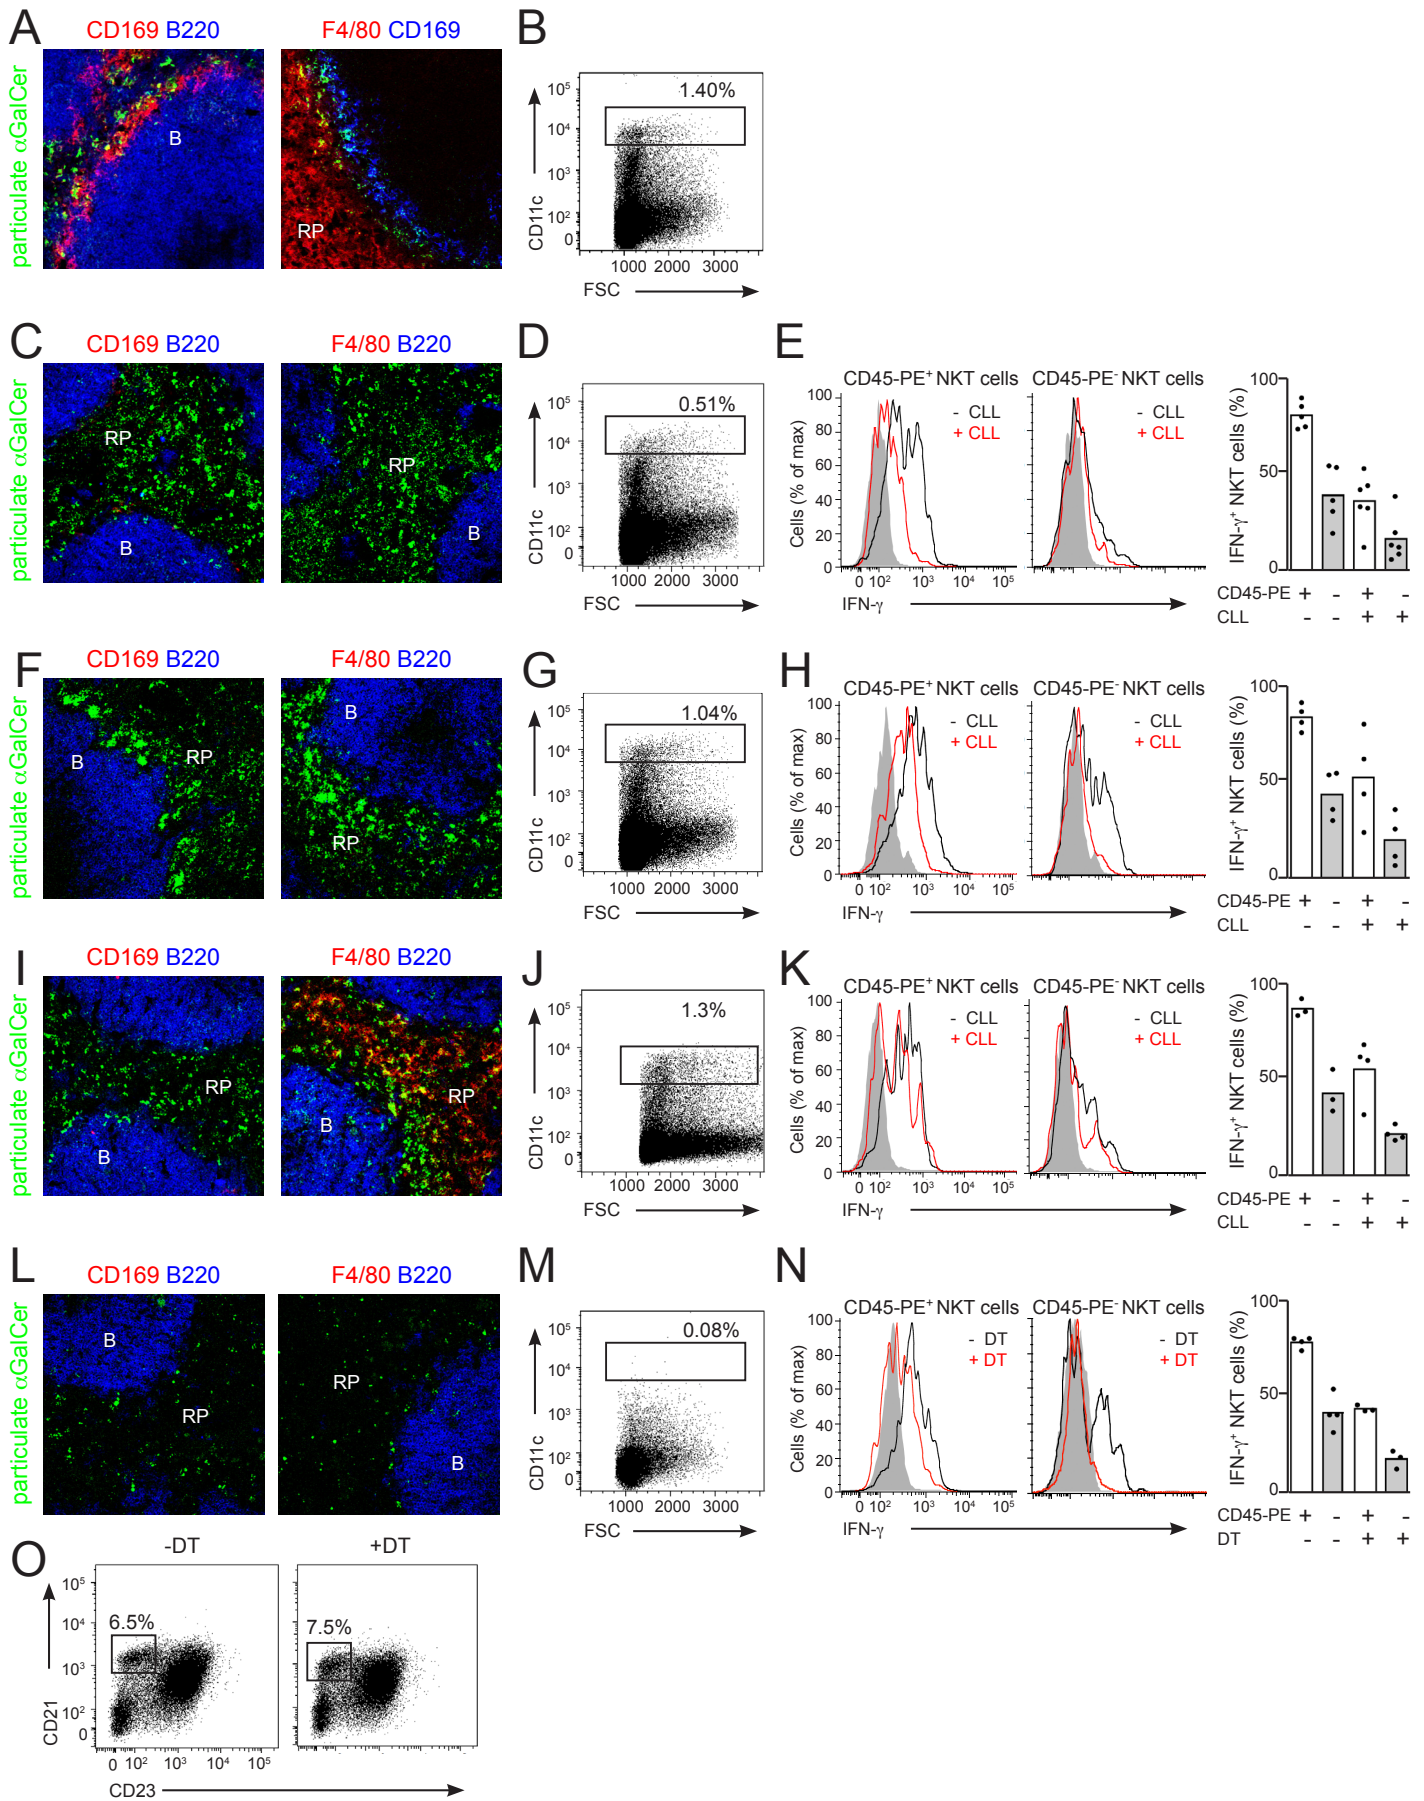

## SUPPLEMENTARY FIGURE LEGENDS

### **Supplementary Figure 1. *In vivo* antibody labelling of splenic NKT cells.**

Expression of CD4 and CD8, NK1.1, DX5, CD69, CD44, CD122 and CD62L in NKT cells that are highly (CD45<sup>+</sup>) or poorly (CD45<sup>-</sup>) labelled at 3 min after *in vivo* injection of CD45 antibody. Grey profiles show the indicated staining for conventional T cells. Data represent 5 independent experiments with 2 mice per experiment

### **Supplementary Figure 2. Distribution of splenic NKT cells. (A,B) Adoptive**

transfer of NKT cells. **(A)** Single cell suspensions were prepared from spleens of V $\alpha$ 14 transgenic mice and depleted of B220<sup>+</sup> cells (left). Sorted cells were >95% CD1d-Tet<sup>+</sup> cells (right). **(B)** 3 x 10<sup>6</sup> purified NKT cells were adoptively transferred into CD45.1 congenic recipient mice. 14-16 h later transferred NKT cells were detected as TCR- $\beta$ <sup>+</sup>-CD45.2<sup>+</sup> cells in the spleen of recipient animals. **(C,D)** Identification of splenic compartments in cryosections. Spleen cryosections were stained with B220 (cyan), TCR- $\beta$  (red) and CD169 (green). Splenic compartments were identified as follows: MZ was limited by CD169 macrophages and identified by the B220 staining of MZ B cells. PALS were defined by TCR- $\beta$  staining and B cell follicles were defined by B220 staining. The remaining area was classified as the RP. Processed images **(D, right)** were analysed in ImageJ to determine the area occupied by each specific compartment **(C, and previously described (Aoshi et al, 2008))**. **(E,F)** Confocal microscopy identification of endogenous **(E)** and adoptively transferred **(F)** NKT cells in spleen sections stained with B220 (cyan), CD169 (green), TCR- $\beta$  (red) and NK1.1 (blue, **E**) or CD45.2 (blue, **F**). Data were pooled from 2 independent experiments with 2 mice each.

**Supplementary Figure 3. Dynamics of splenic NKT cells.** Splenic NKT cells were imaged by multi-photon microscopy after slice-opening of the spleen **(A)** Snapshot images showing NKT cells (red) at the indicated time points. Individual cell tracks are coloured in pink. Stamp, min:sec. Bars, 20  $\mu\text{m}$ . **(B-E)** Average speed **(B)**, arrest coefficient **(C)**, migratory tracks **(D)** and speed distribution **(E)** for NKT cells and T cells. Each dot represents an individual cell. Data were pooled from 2 independent experiments with 2 mice each. *p*, unpaired two-tailed t-test

**Supplementary Figure 4. NKT cell activation occurs in the MZ.** **(A-B)** Confocal microscopy identification of adoptively transferred NKT cells 2h after antigen injection. **(A)** Spleen sections were stained with B220 (cyan), CD169 (green), TCR- $\beta$  (red) and CD45.2 (blue). **(B)** Quantification of distribution of NKT cells in the RP, MZ, B cell follicles (B) and PALS (T). Bars, 200  $\mu\text{m}$ . **(C-F)** Mice were injected with soluble  $\alpha\text{GalCer}$  (0.5  $\mu\text{g}$ ) and 2 h later they received CD45-PE 3 min before analyses. Flow cytometry profiles and quantification of intracellular IFN- $\gamma$  **(C, D)** and IL-4 **(E, F)** for total (left) and highly (middle, CD45-PE<sup>+</sup>) or poorly (right, CD45-PE<sup>-</sup>) CD45-PE labelled NKT cells (TCR- $\beta$ <sup>+</sup> $\alpha\text{GalCer}$ -CD1d tetramer<sup>+</sup>B220<sup>-</sup>). *p*, paired t-test. Data represent 2 independent experiments with at least 3 mice each.

**Supplementary Figure 5. Effect of MZ disruption in NKT cell activation.** Confocal microscopy images **(A,C,F,I,L)** and flow cytometry profiles **(B,D,G,J,M,O)** of spleens of WT mice **(A,B)**, WT mice treated with clodronate liposomes (CLL) for 2 days **(C-E)**, 6 days **(F-H)** or 16 days **(I-K)** and CD11c-DOG mice treated with DT for 2 days **(L-O)**. Mice received an i.v. injection of particulate lipids (green) 2 h before analyses. Splenic sections for immunofluorescence **(A,C,F,I,L)** were stained with B220 (blue), CD169 or F4/80 (red). **(B,D,G,J,M)** Flow cytometry profiles for splenocytes showing the CD11c<sup>high</sup> population. **(E,H,K,N)** Flow cytometry profiles and

quantifications for IFN- $\gamma$  secretion in NKT cells from mice injected with  $\alpha$ GalCer (for 2h) and CD45-PE antibody 3 min before analyses showing highly (left, CD45-PE<sup>+</sup>) and poorly (right, CD45-PE<sup>-</sup>) *in vivo* labeled NKT cells. (O) Flow cytometry profile showing MZ B cell population in CD11c-DOG mice untreated (left) or treated (right) with DT. Data represent 2 independent experiments with at least 2 mice per experiment.

## **SUPPLEMENTARY MOVIES**

**Supplementary Movie 1. Dynamics of NKT cells in the splenic RP.** NKT cells (red) were adoptively transferred into WT recipients and spleens were imaged by multi-photon microscopy. Representative tracks of cell movement are traced (pink). Long ticks represent 20  $\mu$ m. A movie of the XY projection (left) is shown together with three-dimensional representations of the imaged volume (right).

**Supplementary Movie 2. Dynamics NKT cells in the splenic RP.** NKT cells (red) and T cells (blue) were adoptively transferred into WT recipients and spleens were imaged by multi-photon microscopy. Representative tracks of cell movement are traced and coloured according to cell type. Long ticks represent 20  $\mu$ m.

**Supplementary Movie 3. Dynamics NKT cells in splenic sections.** NKT cells (red) were adoptively transferred into WT recipients and spleens were imaged by multi-photon microscopy after slice-opening of the tissue. Representative tracks of cell movement are traced. Long ticks represent 20  $\mu$ m.

**Supplementary Movie 4. NKT cells arrest after antigen administration.** NKT cells (red) and T cells (blue) were adoptively transferred into WT recipients that were



injected with particulate  $\alpha$ GalCer (green) 2 h before imaging. Representative tracks of cell movement are traced and coloured according to cell type. Long ticks represent 10  $\mu$ m.

**Supplementary Movie 5. NKT cells arrest after antigen administration.** NKT cells (red) and T cells (blue) were adoptively transferred into WT recipients that were injected with particulate  $\alpha$ GalCer (green) 2 h before imaging. Representative tracks of cell movement are traced and coloured according to cell type. Long ticks represent 10  $\mu$ m.
